1 **The human cytomegalovirus ER resident glycoprotein UL148 activates the**  
2 **unfolded protein response.**

3

4

5 Mohammed N.A. Siddiquey,<sup>a</sup> Hongbo Zhang,<sup>a</sup> Christopher C. Nguyen,<sup>a</sup> Anthony J.  
6 Domma,<sup>a</sup> and Jeremy P. Kamil<sup>a, #</sup>

7

8 <sup>a</sup> Department of Microbiology and Immunology, LSU Health Sciences Center,  
9 Shreveport, Louisiana, U.S.A.

10

11

12 Running Head: HCMV UL148 activates the UPR

13

14

15 #Address correspondence to Jeremy P. Kamil, [jkamil@lsuhsc.edu](mailto:jkamil@lsuhsc.edu)

16

17 **ABSTRACT.**

18 Eukaryotic cells are equipped with three sensors that respond to the accumulation of  
19 misfolded proteins within the lumen of the endoplasmic reticulum (ER) by activating the  
20 unfolded protein response (UPR), which functions to resolve proteotoxic stresses  
21 involving the secretory pathway. Here, we identify UL148, a viral ER resident  
22 glycoprotein from human cytomegalovirus (HCMV), as an inducer of the UPR.  
23 Metabolic labeling results indicate that global mRNA translation is markedly decreased  
24 when UL148 expression is induced in uninfected cells. Further, we find evidence  
25 suggesting that ectopic expression of UL148 is sufficient to activate at least two UPR  
26 sensors: the inositol requiring enzyme-1 (IRE1), as indicated by splicing of *Xbp1* mRNA,  
27 and the PKR-like ER kinase (PERK), as indicated by phosphorylation of eIF2 $\alpha$  and  
28 accumulation of ATF4 protein. During wild-type HCMV infection, *Xbp-1* splicing, eIF2 $\alpha$   
29 phosphorylation and ATF4 accumulation neatly accompanied the onset of UL148  
30 expression. However, the appearance of these UPR indicators was either markedly  
31 delayed or absent during *UL148*-null infections. siRNA depletion of PERK dampened  
32 the extent of eIF2 $\alpha$  phosphorylation and ATF4 induction observed during wild-type  
33 infection, implicating PERK as opposed to other eIF2 $\alpha$  kinases. A virus disrupted for  
34 *UL148* showed statistically significant 2- to 4-fold decreases during infection in the  
35 levels of transcripts canonically regulated by PERK/ATF4 and by the ATF6 pathway.  
36 Taken together, our results argue that UL148 is sufficient to activate the UPR when  
37 expressed ectopically and that UL148 is an important cause of UPR activation in the  
38 context of the HCMV infected cell.

39

40 **IMPORTANCE.**

41 The unfolded protein response (UPR) is an ancient cellular response to ER stress of  
42 broad importance to viruses. Certain consequences of the UPR, including mRNA  
43 degradation and translational shut-off, would presumably be disadvantageous to  
44 viruses, while other attributes of the UPR, such as ER expansion and upregulation of  
45 protein folding chaperones, might enhance viral replication. Although HCMV is  
46 estimated to express at least 200 distinct viral proteins, we show that the HCMV ER  
47 resident glycoprotein UL148 contributes substantially to the UPR during infection, and  
48 moreover is sufficient to activate the UPR in non-infected cells. Experimental activation  
49 of the UPR in mammalian cells is difficult to achieve without the use of toxins.  
50 Therefore, UL148 may provide a new tool to investigate fundamental aspects of the  
51 UPR. Furthermore, our findings may have implications for understanding the  
52 mechanisms underlying the effects of UL148 on HCMV cell tropism and evasion of cell  
53 mediated immunity.

54

55

56

57

58

59

60

61

62

## 63 INTRODUCTION

64 The endoplasmic reticulum (ER) is a fundamental eukaryotic organelle  
65 comprised of a tubulovesicular network of membranes that extends throughout the  
66 cytosol [reviewed in (1, 2)]. The organelle carries out multifarious processes vital to  
67 cellular and organismal health. For instance, the ER plays key roles in the regulation of  
68 intracellular calcium levels, and provides the site for steroid and lipid synthesis, loading  
69 of peptides onto MHC complexes (3), and synthesis and processing of proteins and  
70 protein complexes destined for secretion. Therefore, it is no surprise that the ER is  
71 exploited by a diverse array of viruses during their replication. For instance,  
72 polyomaviruses exploit the ER for entry (4, 5), whereas flaviviruses (6) and caliciviruses  
73 (7) remodel it to create sites for replication. Large enveloped dsDNA viruses, such as  
74 those in the Herpesviridae, require the ER for the expression and processing of  
75 extraordinarily large amounts of viral glycoproteins needed for the assembly of progeny  
76 virions.

77 In order to utilize the ER to support their replication, however, viruses have had  
78 to develop mechanisms to contend with the unfolded protein response (UPR), an  
79 ancient stress response that serves to maintain ER function and cell viability when  
80 misfolded proteins accumulate within the secretory pathway [reviewed in (8, 9)]. The  
81 UPR is initiated by three different ER-based signaling molecules: inositol-requiring  
82 enzyme-1 (IRE1), the PKR-like ER kinase (PERK), and the cyclic AMP-dependent  
83 transcription factor 6  $\alpha$  (ATF6). Misfolded proteins are thought to displace the ER  
84 chaperone BiP (Grp78) from the luminal domains of IRE1, PERK and ATF6, which  
85 causes their activation. During the UPR, mRNA translation is attenuated, and

86 transcripts associated with rough ER ribosomes are degraded, and a number of genes  
87 are transcriptionally upregulated, resulting in increased expression of ER protein folding  
88 chaperones, ER-associated degradation (ERAD) proteins, as well as various factors  
89 that can expand the size and secretory capacity of the ER. Hence, certain  
90 consequences of the UPR, particularly translational attenuation, would be expected be  
91 deleterious to viruses, while others, such as ER expansion, could enhance the capacity  
92 of the infected host cell to produce progeny virions.

93         Cytomegaloviruses have been found to activate the UPR while subverting certain  
94 aspects of it (10, 11). Interestingly, the viral nuclear egress complex component m50 of  
95 murine cytomegalovirus (MCMV) degrades IRE1, and the human cytomegalovirus  
96 (HCMV) homolog UL50 apparently shares this activity (12). Cytoplasmic splicing of  
97 *Xbp-1* mRNA is mediated by IRE1 nuclease activity upon UPR activation. This splicing  
98 event is required for translation of the transcription factor XBP1s, which upregulates  
99 ERAD factors and ER chaperones, among other target genes (13). In addition, IRE1  
100 degrades mRNAs undergoing translation at the rough ER (14). Therefore, IRE1  
101 downregulation may help to maintain viral glycoprotein expression in the face of UPR  
102 activation. Despite this function of UL50, Isler et. al. found evidence that IRE1 is  
103 activated during HCMV infection (10). In addition to IRE1, PERK is activated during  
104 HCMV and MCMV infection (10, 11), and the PERK / ATF4 axis appears to be required  
105 for efficient viral replication, as defects in viral upregulation of lipid synthesis are  
106 observed in cells lacking PERK (15).

107         Interestingly, the viral proteins or processes that activate PERK and IRE1 in the  
108 context of HCMV infection have not been clearly identified. We recently reported that

109 UL148 interacts with SEL1L, a component of the cellular ERAD machinery that plays  
110 crucial roles in the disposal of misfolded proteins from the ER (16). Having observed  
111 very poor expression for any glycoprotein ectopically co-expressed with UL148 in  
112 uninfected cells (not shown), we hypothesized that UL148 might trigger the UPR. Here,  
113 we show that ectopically expressed UL148 is not only sufficient to activate the PERK  
114 and IRE1 arms of the UPR, but also strongly contributes to the activation of PERK and  
115 IRE1 during HCMV infection.

116

## 117 **RESULTS**

### 118 **Ectopic expression of UL148 attenuates translation.**

119 As a first step to formally investigate whether UL148 might contribute to ER  
120 stress that would trigger the unfolded protein response (UPR), we asked whether  
121 ectopic expression of UL148 in uninfected cells would dampen protein synthesis, since  
122 translational shutdown is a hallmark of stress responses, including the UPR. To  
123 address this question, we employed a “tet-on” lentiviral vector system that would allow  
124 us to inducibly express UL148 or its homolog from rhesus cytomegalovirus, Rh159 (17,  
125 18), each harboring a C-terminal influenza A hemagglutinin (HA) epitope tag. Rh159  
126 was used to control for any nonspecific effects of overexpression of an ER resident  
127 glycoprotein. We chose Rh159 as a control for the following reasons. Firstly, like  
128 UL148, Rh159 is predicted to be type I transmembrane protein with a very short  
129 cytoplasmic tail. Secondly, although Rh159 shares 30% amino acid identity with  
130 UL148, these two proteins appear to carry out different functions (18-20). Thirdly,

131 UL148 and Rh159 appeared to express at similar levels during ectopic expression (see  
132 below).

133 Having isolated stably transduced ARPE-19 cell populations, we confirmed that  
134 that anti-HA immunoreactive polypeptides of the expected size for UL148 (i148<sup>HA</sup>) or  
135 Rh159 (i159<sup>HA</sup>) were induced upon treatment with 100 ng/mL doxycycline (dox) (Fig.  
136 1A). Furthermore, expression of neither protein caused any overt reduction in cell  
137 viability or number, as measured by trypan blue exclusion following 24 h of dox  
138 induction (Fig. 1B, 1C). We therefore concluded that the i148<sup>HA</sup> and i159<sup>HA</sup> ARPE-19  
139 cells were suitable to address whether UL148 might affect rates of mRNA translation in  
140 metabolic labeling studies. For these experiments, i148<sup>HA</sup> and i159<sup>HA</sup> cells were induced  
141 (or mock induced) for transgene expression for 24 h, and then incubated in the  
142 presence of <sup>35</sup>S-labeled methionine and cysteine for 30 min. In parallel, labeling was  
143 also carried out using i159<sup>HA</sup> cells that were incubated in the presence of either  
144 thapsigargin (Tg) or carrier-alone, so as to provide positive and negative controls,  
145 respectively, for UPR induction.

146 We found that expression of UL148 but not Rh159 caused a substantial, ~50%  
147 decrease in protein synthesis compared to the carrier-alone (water) treated control, as  
148 measured by phosphor-image analysis (Fig. 1D). Strikingly, the attenuation of  
149 translation observed during UL148 expression was similar in magnitude to that seen  
150 during Tg treatment (Fig. 1D). These effects did not appear to be caused by the  
151 inducing agent, since dox treatment of i159<sup>HA</sup> cells failed to cause any reduction in <sup>35</sup>S  
152 incorporation. From these results, we concluded that expression of UL148 attenuates  
153 translation. Since UL148 is an ER resident glycoprotein, with a predicted type I

154 transmembrane topology that places most of the polypeptide in the ER lumen (19), it  
155 seemed plausible that the effects of UL148 on global rates of mRNA translation might  
156 be indicative of the UPR. We thus sought to address the hypothesis that UL148  
157 activates the UPR.

158

159 **UL148 leads to PERK-dependent phosphorylation of eIF2 $\alpha$  and accumulation of**  
160 **ATF4.**

161 Translational attenuation during the UPR is mediated by the PKR-like ER kinase,  
162 PERK, which phosphorylates Ser51 of the  $\alpha$ -subunit of the ternary eIF2 complex (21).  
163 The guanine nucleotide exchange factor eIF2B binds to the phosphorylated eIF2  
164 complex with increased affinity, and fails to exchange bound GDP for GTP (22). Since  
165 GDP/GTP exchange is necessary for eIF2 to participate in a new round of translational  
166 initiation, and because eIF2 $\alpha$  is present in cells at a considerable molar excess relative  
167 to eIF2B, global protein synthesis halts in response to even modest levels of  
168 phosphorylated eIF2 $\alpha$  [reviewed in (23)]. Meanwhile, eIF2 $\alpha$  phosphorylation leads to  
169 enhanced translation of certain mRNAs, such as that encoding ATF4, which harbor  
170  $\mu$ ORFs in their 5'UTRs that inhibit their translation under non-stressed conditions (24).  
171 Although there are four different kinases that have been identified to phosphorylate  
172 eIF2 $\alpha$  at Ser51, two observations imply that the translational attenuation we observed  
173 during UL148 expression was due to activation of PERK: (i) UL148 localizes to the ER  
174 (19), and (ii) interacts with the ERAD machinery (16). Therefore, we next monitored  
175 levels of PERK, eIF2 $\alpha$  phosphorylation, and ATF4 following dox induction of either  
176 UL148 or Rh159 in ARPE-19 cells.



177 We observed that UL148 and Rh159 proteins accumulated to readily detectable  
178 levels by 8 h post induction with dox, although faint expression was detected at 4 h post  
179 induction (Fig. 2). By 24 h post induction, the i148<sup>HA</sup> cells showed robust levels of ATF4  
180 protein, albeit not as high as those seen during Tg treatment, which was included as a  
181 positive control for PERK activation. Increased levels of phospho-eIF2 $\alpha$  were detected  
182 from 24 h to 48 h following induction of UL148, but not during induction of Rh159.  
183 Moreover, PERK protein levels appeared to be upregulated at 24 h post induction in  
184 i148<sup>HA</sup> cells, but not in i159<sup>HA</sup> cells. Decreased mobility of the anti-PERK  
185 immunoreactive band, which likely indicates PERK autophosphorylation upon UPR  
186 activation, was readily observed in the Tg condition, but not following induction of either  
187 UL148 or Rh159 (Fig. 2), which may indicate that PERK is less synchronously activated  
188 following dox-induction of UL148 than by the comparatively shorter (4 h) Tg treatment.  
189 Although we could not exclude the possibility that UL148 might cause these effects via  
190 activation of different eIF2 $\alpha$  kinase, the simplest interpretation of these results is that  
191 expression of UL148 activates PERK.

192

### 193 **UL148 is sufficient to induce splicing of *Xbp-1* mRNA.**

194 To determine whether UL148 activates IRE1, we transfected human embryonic  
195 kidney (HEK)-293T cells with plasmids that drive expression of UL148 or Rh159  
196 carrying C-terminal HA-tags. We also examined the effects of a 2 h treatment with 1  
197 mM dithiothreitol (DTT), as a positive control treatment known to activate IRE1. At 48 h  
198 post transfection, we harvested cells for isolation of total RNA and for protein lysates to  
199 monitor transgene expression. As a read-out for IRE1 activity, we used reverse-

200 transcriptase PCR (RT-PCR) to detect the removal of 26 nucleotides (nt) from the *Xbp-1*  
201 mRNA. This unorthodox splicing event is catalyzed in the cytosol by IRE1; its detection  
202 is widely used as an indicator of the UPR in general, and of IRE1 nuclease activity in  
203 particular (25-27). Although we also tried this assay using our dox-inducible ARPE-19  
204 cells (not shown), we found that transient transfection of HEK-293 cells gave the most  
205 readily interpretable results (Fig. 3).

206 As expected, the 2 h DTT treatment caused the 26-nt intron to be spliced from  
207 nearly all the *Xbp-1* mRNA detected in our assay (Fig. 3A). Cells transfected with either  
208 the Rh159 expression plasmid or empty vector failed to show notable levels of *Xbp-1*  
209 splicing. In contrast, removal of the 26-bp was readily detected from cells expressing  
210 UL148, with approximately equal levels of RT-PCR products for spliced and unspliced  
211 *Xbp-1* (Fig. 3A). Furthermore, the expression of anti-HA immunoreactive bands of the  
212 expected sizes for Rh159 and UL148 was confirmed by western blot (Fig. 3B). From  
213 these results, we concluded that ectopic expression of UL148 but not Rh159 is sufficient  
214 to induce splicing of the 26-nt intron from *Xbp-1* mRNA. Given that IRE1 is required for  
215 this splicing event (25-28), our results argue that UL148 expression is sufficient to  
216 activate IRE1.

217

### 218 **UL148 activates IRE1 during HCMV infection.**

219 Since UL148 was apparently capable of activating the UPR when ectopically  
220 expressed, we wondered whether UL148 might contribute to the UPR activation in the  
221 context of HCMV infection. Therefore, we conducted a time-course experiment  
222 comparing IRE1 catalyzed splicing of *Xbp-1* in fibroblasts infected at MOI 1 with either

223 wild-type (WT) HCMV strain TB40/E (TB\_WT) or a *UL148*-null mutant, TB\_148<sub>STOP</sub> (16).  
224 Remarkably, while WT infected cells showed increasing levels of spliced *Xbp-1* (*Xbp-*  
225 *1s*) as infection progressed, *UL148*-null virus infected cells, showed only very low levels  
226 of spliced *Xbp-1* that did not increase over time (Fig. 4). It is also notable that during  
227 WT infection the proportion of spliced to unspliced *Xbp-1* message increased from 24  
228 hpi to 144 hpi. These effects correlate nicely with appearance of detectable levels of  
229 UL148 during infection and with increases in its levels that occur as infection progresses  
230 (Fig. 5). Further, we observed comparable levels of *IE2* mRNA by semi-quantitative  
231 RT-PCR, indicating that infection with the two viruses occurred at similar levels (Fig. 4).  
232 We interpreted these results to suggest that UL148 contributes to activation of IRE1 and  
233 concomitant cytoplasmic splicing of *Xbp-1* mRNA during HCMV infection. Since *Xbp-1*  
234 splicing is an important hallmark of UPR activation, these results also suggest that  
235 UL148 is a considerable source of ER stress in the context of HCMV infected cells.

236

237 **UL148 contributes to PERK-dependent increases in phosphorylated eIF2 $\alpha$  and**  
238 **ATF4 during HCMV infection.**

239 To evaluate whether UL148 contributes to PERK activation during infection, we  
240 monitored levels of PERK, phospho-eIF2 $\alpha$ , and ATF4 following MOI 1 infection of  
241 fibroblasts with WT or *UL148*-null virus. We found striking differences between the WT  
242 and *UL148*-disrupted infection contexts in each of these parameters, which together  
243 suggest a role for UL148 in activation of PERK. In WT infected cells, ATF4 levels  
244 showed an obvious increase at 48 h post infection (hpi) and reached near maximal  
245 expression at 72 hpi, with the highest levels detected at 96 hpi (Fig. 5A). The changes

246 in ATF4 expression during WT infection coincided with increased phosphorylation of  
247 eIF2 $\alpha$  and higher levels of PERK, as expected (10, 24). The kinetics of ATF4  
248 expression tightly correlated, to a remarkable degree, with those seen for UL148 (Fig.  
249 5A).

250 In cells infected with *UL148*-null virus, ATF4 was weakly expressed at most of  
251 the time points monitored, although faint increases were seen at 72 hpi and 84 hpi. At  
252 96 hpi, however, a strong burst of ATF4 expression was detected, which was  
253 accompanied by an increase in phosphorylated eIF2 $\alpha$ . This observation suggests that  
254 UL148-independent activation of one or more eIF2 $\alpha$  kinases occurs at very late times  
255 during infection. Importantly, levels of the viral IE1 (IE1-72) protein were similar across  
256 all time points for both viruses, indicating that infection occurred efficiently in both WT  
257 and *UL148*-null settings (Fig. 5A), as would be expected since *UL148*-null mutants  
258 replicate indistinguishably from WT in fibroblasts (19). Because the UL148-independent  
259 rise in levels of phospho-eIF2 $\alpha$  and ATF4 occurred between 84 and 96 hpi, we  
260 reasoned that the 72 hpi time point would best allow us to isolate the effect of UL148 on  
261 these indicators of PERK activation. By measuring the fluorescence signal from  
262 secondary antibodies from multiple biological replicates, we were able to estimate that  
263 at 72 hpi WT infected cells contain 2.5-fold higher levels of phospho-eIF2 $\alpha$ , and 4.3-fold  
264 higher levels of ATF4 relative to *UL148*<sub>STOP</sub> infections (Fig. 5B).

265 In order to more specifically address whether PERK is required for UL148 to  
266 cause phosphorylation of eIF2 $\alpha$  and accumulation of ATF4, we used siRNA to silence  
267 PERK expression prior to infection, and then monitored for phosphorylation of eIF2 $\alpha$   
268 and expression of ATF4 from 24 to 72 hpi. Levels of PERK were substantially reduced

269 but not completely eliminated by the PERK-targeted siRNA treatment, as compared to  
270 the non-targeting control siRNA (NTC) (Fig. 6). In PERK-silenced cells during WT  
271 infection, phosphorylation of eIF2 $\alpha$  was attenuated at both 48 hpi and 72 hpi and a  
272 substantial decrease in ATF4 was seen at 72 hpi (Fig. 6). During *UL148*-null infections,  
273 however, PERK knockdown led to only minimal effects on phosphorylation of eIF2 $\alpha$ ,  
274 and virtually imperceptible effects on ATF4 (Fig. 6), which may well reflect reduced  
275 levels of ER stress in the absence of UL148.

276 Quantification of fluorescent secondary antibody signals suggested that in the  
277 case of WT virus at 72 hpi, PERK knockdown led to a 40% decrease in the levels of  
278 phospho-eIF2 $\alpha$  and ATF4. Because the siRNA knockdown of PERK was incomplete,  
279 these results seem likely underestimate the degree to which UL148 depends on PERK  
280 to cause phosphorylation of eIF2 $\alpha$  and to increase ATF4 expression. Overall, we  
281 interpreted these findings to argue that UL148 activates PERK during HCMV infection.

282

### 283 **UL148 contributes to differences in mRNA levels for UPR target genes.**

284 A major function of the UPR is to cause changes in cellular gene expression.  
285 Since ATF4 and XBP1s are transcription factors that contribute to UPR mediated  
286 changes in gene expression (13, 24, 29), we next wished to determine whether UL148  
287 contributes to effects of HCMV on mRNA levels for cellular genes that are known to be  
288 regulated by the UPR. Further, because we were unable to obtain antibody sensitive  
289 enough to test whether activation of ATF6 was influenced by UL148 (not shown), and  
290 because it has been reported that HCMV infection does not lead to ATF6 activation, but  
291 that genes regulated by ATF6 are nonetheless upregulated (10, 30), we also sought to

292 address whether UL148 might contribute to upregulation of ATF6 target genes.

293 Therefore, we isolated total RNA from WT and *UL148*-null infected fibroblasts at 72 hpi  
294 and used RT-qPCR to measure mRNA levels for representative UPR target genes,  
295 including ATF6 target genes in addition to those regulated by ATF4 (PERK) and XBP1s  
296 (IRE1).

297 With regard to the PERK pathway, our results show that relative to *UL148*-null  
298 virus infected cells, WT virus infected cells exhibited nearly 4-fold higher mRNA levels  
299 for the ATF4 target gene CHOP, and roughly 2-fold higher mRNA levels for another  
300 ATF4 target, GADD34 (Fig. 7). These differences were found to be statistically  
301 significant ( $P < 0.05$ ). Despite the UL148-dependent effects we observed on *Xbp-1*  
302 splicing (Figs. 3-4), the levels of mRNAs from XBP1s target genes did not appreciably  
303 differ between WT and *UL148*-null infections (Fig. 7). This result is consistent with a  
304 previous report that failed to find an effect of HCMV-induced *Xbp-1* splicing on mRNA  
305 levels for the XBP1s target gene *EDEM1* (10). Intriguingly, we did find significant  
306 differences for a number of ATF6 target genes that were upregulated in WT relative to  
307 *UL148*-null infections, including *BiP*, *SEL1L*, *HERPUD1*, and *HYOU1*, all of which  
308 showed approximately 2-fold higher expression during WT infection. Although *PDIA4*  
309 was upregulated by over two-fold in cells infected with WT virus compared to those  
310 infected with *UL148*-null virus, this difference was not found reach statistical  
311 significance. From these results, we concluded that UL148 contributes during HCMV  
312 infection to upregulation of UPR target genes related to the PERK and ATF6 arms of  
313 the UPR.

314

315

## 316 **DISCUSSION**

317 HCMV is estimated to encode 164-192 distinct genes (31, 32), with a more  
318 recent study arguing for up to 751 protein coding ORFs (33). Thus, the degree to which  
319 our results suggest that UL148 alone contributes to UPR induction during HCMV  
320 infection is remarkable. The original work demonstrating that HCMV activates the UPR  
321 conducted their studies using the laboratory-adapted virus strain Towne (10), which  
322 unlike another widely studied laboratory strain, AD169, retains the capacity to express  
323 UL148 (34, 35). Accordingly, the kinetics of ATF4 protein accumulation and  
324 phosphorylation of eIF2 $\alpha$  that we observed for cells infected with wild-type (WT) strain  
325 TB40/E (Fig. 5) are highly consistent with those observed in the latter study (10), and  
326 the extent to which these indicators of PERK activation were dampened during *UL148*-  
327 null infection is striking (Figs. 5-6).

328 Cells infected with *UL148*-null viruses exhibited reduced levels of eIF2 $\alpha$   
329 phosphorylation and impaired induction of ATF4 at times prior to 96 hpi (Fig. 5).  
330 Although there are three other eIF2 $\alpha$  kinases, we contend that because UL148 is an  
331 ER-resident protein, and also appears to activate IRE1, another sensor of ER stress,  
332 the effects on eIF2 $\alpha$  phosphorylation and ATF4 levels most like occur via PERK. In  
333 support of this notion, PERK knockdown diminished the effect of UL148 on ATF4  
334 induction (Fig. 6). Similarly, in studies with MCMV Qian et al. found that knockdown of  
335 PERK led to attenuated levels of ATF4 (11). Thus, both human and murine  
336 cytomegaloviruses appear to induce phosphorylation of eIF2 $\alpha$  and ATF4 upregulation  
337 via PERK even though MCMV does not encode a UL148 homolog.

338 Furthermore, we detected 2 to 4-fold higher mRNA levels for two ATF4-regulated  
339 regulated genes, CHOP and GADD34, in WT compared to *UL148*-null infected cells  
340 (Fig. 7). As opposed to the effects of UL148 on *Xbp-1* splicing (Fig. 4), which were not  
341 accompanied by differences in mRNA levels for XBP1s target genes, the effects of  
342 UL148 on the PERK-ATF4 axis were accompanied by the expected changes in gene  
343 expression (Fig. 6). Nonetheless, our *Xbp-1* splicing results argue that UL148 is  
344 sufficient to activate IRE1 (Fig. 3). Moreover, UL148 appears to account for most of the  
345 IRE1 activation observed during HCMV infection (Fig. 4). These effects are particularly  
346 noteworthy as they presumably occur in the face of viral downregulation of IRE1 by the  
347 viral nuclear egress factor UL50 (12).

348 Although the kinetics of *Xbp-1* splicing we observed during WT infection were  
349 similar to those seen by Isler et al. (10), the ratio of spliced-to-unspliced message  
350 appeared to be much higher in our results and may reflect differences in UL148  
351 expression between strains Towne and TB40/E. In our hands, the Towne strain  
352 appears to express UL148 at much lower levels than TB40/E (H. Zhang and J.P. Kamil,  
353 unpublished results). Regardless, *XBP1s* target genes such as EDEM1 (36, 37) were  
354 not found to be upregulated in a UL148-dependent manner (Fig. 6), as is fully consistent  
355 with the findings of Isler et al. (10), who likewise failed to observe EDEM1 upregulation  
356 despite observing *Xbp-1* splicing during infection.

357 Since XBP1s target genes are apparently refractory to IRE1 activation during  
358 HCMV infection, the implications to the virus of IRE1 activation are unclear. However,  
359 splicing of *Xbp-1* is not the only function of IRE1. IRE1 also activates the JNK signaling  
360 pathway (38) and degrades mRNAs associated with the rough ER (14). Furthermore,



361 IRE1 confers resistance to apoptosis during hepatitis C infection by degrading miR-  
362 125a (39). Albeit that we used *Xbp-1* splicing as a specific readout for activation of  
363 IRE1, it seems conceivable that functions of IRE1 unrelated to splicing of *Xbp-1* mRNA  
364 may be relevant to phenotypes governed by UL148.

365         Whether UL148 activates the third UPR sensor, ATF6, remains unresolved.  
366 *UL148*-null virus infected cells did show lower mRNA levels for ATF6 target genes  
367 compared to WT infected cells (Fig. 7), which may suggest that ATF6 is activated by  
368 UL148. Unfortunately, we have not been able to directly evaluate this matter directly,  
369 owing to the limited sensitivity in our hands of commercially available ATF6 antibodies  
370 (not shown). ATF6 is proteolytically processed by the same proteases that regulate  
371 sterol responsive element binding proteins (SREPBs), S1P and S2P (40). Under  
372 conditions of ER stress, ATF6 transits from the ER to the Golgi where S1P and S2P  
373 release the cytoplasmic domain of ATF6 from its transmembrane anchor, allowing it to  
374 transit to the nucleus where it binds to cis-acting ER stress regulatory elements (ERSE)  
375 and upregulates genes for ER chaperones, such as BiP (Grp78) (26, 41).

376         Nonetheless, upregulation of BiP reportedly occurs in an ERSE-independent  
377 manner during HCMV infection (30). Although Isler et al. were unable to detect ATF6  
378 cleavage despite finding target genes to be upregulated during HCMV infection (10), the  
379 S1P/S2P processed nuclear form of ATF6, like SREBPs, is rapidly degraded in the  
380 absence of proteasome inhibitors (40). Hence, it is difficult to exclude the possibility  
381 that that low levels of ATF6 activation occur during HCMV infection. Given these  
382 circumstances, it may be challenging to address the potential role of UL148 in ATF6  
383 activation.

384

385 **Why would HCMV encode a protein that activates the UPR?**

386         It is intriguing to consider why HCMV would encode a viral protein that potentially  
387 triggers the UPR. Certain consequences of the UPR, such as enhanced ERAD and  
388 attenuation of translation, might be expected to be unfavorable for viral replication. For  
389 instance, degradation of mRNAs by IRE1 could hamper the expression of viral  
390 glycoproteins, and phosphorylation of eIF2 $\alpha$  by PERK could dampen viral gene  
391 expression. However, maintaining translation of viral mRNAs is a *sine qua non* for  
392 cytolytic viruses, and the literature resoundingly suggests HCMV is no exception  
393 [reviewed in (42)]. In particular, UL38 plays a role in disarming ER stress, as it appears  
394 to limit both PERK activation and stress-induced translation of *ATF4* mRNA during  
395 infection (43). Nonetheless, PERK is required for efficient HCMV replication, and  
396 defects in viral upregulation of lipid synthesis have been observed during infection of  
397 PERK depleted cells (15). Meanwhile, activation of ATF6 and IRE1 are required for ER  
398 expansion, upregulation of ER chaperones, and for increased synthesis of lipids (25, 41,  
399 44-48), all of which may benefit viral replication.

400         Given the substantial contribution of UL148 to UPR activation documented here,  
401 and the potential for the UPR to both negatively and positively impact viral replication, it  
402 is puzzling that *UL148*-null viruses are found to replicate indistinguishably from WT virus  
403 in fibroblasts (16, 19). Although we cannot yet exclude whether decreased induction of  
404 the UPR contributes to the enhanced growth of *UL148*-null virus in epithelial cells, the  
405 influence of UL148 on the expression of alternative gH/gL complexes, particularly  
406 gH/gL/gO, (16, 19) seems a more likely explanation. A derivative of the HCMV strain

407 AD169 that was restored both for *UL148* and for expression of the pentameric  
408 gH/gL/UL128-131 complex (16) appears to replicate at least as well in epithelial cells as  
409 the parental virus lacking *UL148*, while failing to show differences in gH/gL/gO  
410 expression in virions (Nguyen C.C., Siddiquey, M.N.A., Li, G. and Kamil J.P.,  
411 unpublished results). We thus consider it unlikely that expression of *UL148* is directly  
412 detrimental to productive replication of HCMV in epithelial cells, especially since viral  
413 factors such as *UL50* (12) and *UL38* (43, 49) would be expected to blunt any negative  
414 impacts to the virus of UPR induction.

415

#### 416 **Implications for mechanisms underlying *UL148* dependent phenotypes.**

417       Going forward, it will be crucial to delineate which biological roles and/or  
418 phenotypic effects of *UL148* require induction of the UPR. We cannot yet dismiss the  
419 possibility that UPR induction is incidental to the *bona fide* biological function(s) of  
420 *UL148*, which could be modulation of virion cell tropism (19), or evasion of cell-mediated  
421 immune responses (20). In other words, UPR activation may not be required for the  
422 effects of *UL148* that provide a fitness advantage to the virus. For example, although  
423 the HCMV ER resident immune-evasin *US11* triggers the UPR in uninfected cells, the  
424 UPR does not appear to be required for *US11*-mediated degradation of the MHC I  
425 heavy chain (50). On the other hand, certain observations suggest that UPR induction  
426 may be inseparable from the role of *UL148* in cell tropism. We recently reported that  
427 *UL148* co-purifies from infected cells with *SEL1L*, a key component of the cellular  
428 machinery for ER associated degradation (ERAD), and have found that *UL148*  
429 attenuates ERAD of newly synthesized glycoprotein O (gO), which itself appears to be a

430 constitutive substrate for ERAD (16). Therefore, one might hypothesize that UL148  
431 interacts with the ERAD machinery to impede processing of misfolded proteins, which  
432 consequently results in UPR activation.

433 UL148 was recently found to block surface presentation of CD58 (LFA3), a co-  
434 stimulatory ligand that potentiates T-lymphocyte and NK-cell responses (20).

435 Intriguingly, UL148 causes markedly reduced N-glycosylation of CD58 (20), which is  
436 exactly the opposite of its effect on gO (16, 19). Rh159, which shares significant  
437 sequence homology with UL148 and is involved in retention of a distinct set of co-  
438 stimulatory molecules(18), does not appear to activate the UPR (Figs. 1-3). Although it  
439 is unknown whether UL148 requires UPR activation to downregulate CD58, knowledge  
440 of the proximal events by which UL148 activates the UPR will likely prove integral to  
441 understanding the mechanisms underlying its influence on viral immune evasion and  
442 modulation of tropism.

443 Finally, it is worth pointing out that UL148 may hold promise as a reagent to  
444 investigate the UPR itself. Much of our understanding of the mammalian UPR comes  
445 from experimental approaches in which toxic chemicals, such as thapsigargin or  
446 tunicamycin, are relied upon to synchronously and robustly induce the UPR in cultured  
447 cells. A recent report found that such chemicals fail to accurately recapitulate the  
448 authentic UPR induced by unfolded proteins within the ER lumen (51). Albeit that the  
449 molecular events by which UL148 initiates the UPR remain to be determined, this viral  
450 ER resident glycoprotein may represent a fascinating new tool to interrogate how cells  
451 adapt to ER stress.

452

453 **MATERIALS AND METHODS.**

454

455 **Cells and Virus.**

456 Primary Human foreskin fibroblasts (HFF, ATCC #SCRC-1041) were immortalized  
457 by transducing lentivirus encoding human telomerase (hTERT) to yield HFFT cells. HEK-  
458 293T cells were purchased from Genhunter Corp. (Nashville, TN). The retinal pigment  
459 epithelial cell line ARPE-19 was purchased from ATCC (CRL-2302). All cells were  
460 cultured in Dulbecco's Modified Eagle's Medium (DMEM, Corning # 10013CV)  
461 supplemented with 25 µg/mL gentamicin, 10 µg/mL ciprofloxacin-HCl, and either 5% fetal  
462 bovine serum (FBS, Sigma-Aldrich #F2442) or 5% newborn calf serum (NCS, Sigma-  
463 Aldrich #N4637).

464 Viruses were reconstituted by electroporation of HCMV bacterial artificial  
465 chromosomes (BACs) into HFFTs, as described previously (19, 52), and grown until 100%  
466 CPE was observed. Cell-associated virus was released by Dounce-homogenization of  
467 pelleted infected cells, clarified of cell debris by centrifugation (1000g, 10 min), and  
468 combined with the culture supernatants. Cell-associated and cell-free virus containing  
469 virus were combined and then ultracentrifuged through a 20% sorbitol cushion (85,000g,  
470 1 h, 4°C). The resulting virus pellet was resuspended in DMEM containing 20% NCS.  
471 Viruses for this study were all derived from the bacterial artificial chromosome clone of  
472 HCMV strain TB40/E, TB40E-BAC4 (53), which was a generous gift of Christian Sinzger  
473 (Ulm, Germany). A *UL148*- null mutant derived from TB40E-BAC4, TB\_148<sub>STOP</sub>, has  
474 been described elsewhere (16). BACs and plasmid DNAs for transfection were purified  
475 from *E. coli* using Nucleobond Xtra Midi kits (Machery-Nagel, Inc.).

476

477 **Virus titration.**

478 Infectivity of virus stocks and samples were determined by the tissue culture infectious  
479 dose 50% (TCID<sub>50</sub>) assay. Briefly, serial dilutions of virus were used to infect multiple  
480 wells of a 96-well plate. After 9 days, wells were scored as positive or negative for CPE,  
481 and TCID<sub>50</sub> values were calculated according to the Spearman-Kärber method, as  
482 described previously (16).

483

484 **Construction of plasmids.**

485 UL148 and Rh159 were PCR amplified from plasmids pEF1-UL148HA (19) and pcDNA-  
486 Rh159 IRES-GFP (a gift of Klaus Frueh, Oregon Health Sciences University, Beaverton,  
487 OR) using primer pairs UL148\_reclone\_Fw and UL148 reclone Rv, and Rh159 Fw and  
488 Rh159\_HA\_Rv, respectively (Table 1). The PCR product for UL148 was ligated into  
489 pcDNA3.1(+) (Invitrogen) using the BamHI and EcoRI sites, while the PCR product for  
490 Rh159 was inserted into the EcoRV site using a Gibson Assembly Reaction using NEB  
491 HiFi DNA assembly Master Mix (New England Biolabs). Final plasmids were sequence  
492 confirmed using T7 and BGH reverse primers. To construct lentiviral vectors for inducible  
493 expression of Rh159 and UL148, pInducer10-miR-RUP-PheS (54) (a generous gift of  
494 Stephen J. Elledge, Harvard Medical School, Addgene #44011) was digested with NotI  
495 and MluI to remove the miR-30 cassette and re-assembled using oligo RFP\_stitch in  
496 Gibson reaction (55) to yield pIND-RFP. Plasmid pTRE3G-dTomato was assembled by  
497 Vector Builder. The TRE3G promoter was PCR-amplified with primers TRE3Gvb\_Fw and  
498 TRE3Gvb\_Rv and assembled into EcoRV-digested pSP72 by Gibson reaction to yield

499 pSP72-TRE3G, which was sequence-verified using universal primer SP6. Following the  
500 example of Stinski and coworkers (56), the *crs* of the minimal CMV promoter within  
501 TRE3G was mutated from CGTTTAGTGAACCGT to CAGGTAGTGAACCGT by overlap  
502 extension PCR using primers TRE3G\_crsmut\_Fw and TRE3G\_crsmut\_Rv (57). Finally,  
503 the  $\Delta crs$  TRE3G promoter was digested out of pSP72-TRE3G using NheI/Agel and  
504 ligated into NheI/Agel-digested pIND-RFP to yield pOUPc-RFP. pOUPc-UL148HA was  
505 constructed by PCR amplifying the UL148HA CDS from plasmid pcDNA3.1-UL148HA  
506 using primers UL148HAgibs\_Fw and HAgibs\_Rv and Gibson-assembling the product into  
507 Agel/MluI-digested pOUPc-RFP. pOUPc-Rh159HA was constructed by PCR amplifying  
508 the Rh159HA CDS from plasmid pcDNA3.1-Rh159HA using primers Rh159HAgibs\_Fw  
509 and HAeco\_gibs\_Rv and Gibson-assembling the product into Agel/MluI-digested pOUPc-  
510 RFP. pOUPc-UL148HA and -Rh159HA were sequence-confirmed using primers  
511 CMVcrsnull\_Fw and Ubc\_Rv.

512

513 **Lentivirus vector transduction.** To generate stable i148<sup>HA</sup> and i159<sup>HA</sup> cell populations,  
514 replication defective HIV-1 based lentivirus vector particles were generated from pOUPc-  
515 UL148HA or -Rh159HA, as described previously (52). Briefly,  $5 \times 10^5$  293T cells per well  
516 of a six-well cluster plate were co-transfected with pOUPc-UL148HA or pOUPc -  
517 Rh159HA, together with psPAX2 (Addgene #12260) and pMD2.G (Addgene #12259)  
518 using *TransIT-293* reagent (Mirus Bio, Inc.) as per the manufacturer's instructions.  
519 Supernatants collected at 2 and 3 d post-transfection were combined, filtered through a  
520 0.45  $\mu$ m cellulose acetate syringe filter (Corning, Inc.), added to complete DMEM growth  
521 medium supplemented with 8  $\mu$ g/mL polybrene (Sigma Aldrich) and applied to

522 subconfluent ARPE-19 monolayers. The next day, medium was removed and the cells  
523 were washed three times with Dulbecco's PBS (PBS: 2.7 mM KCl, 1.5 mM KH<sub>2</sub>PO<sub>4</sub>, 137  
524 mM NaCl, 8.1 mM Na<sub>2</sub>HPO<sub>4</sub>, pH 7.4). Starting at 2 d post-transduction, cells were  
525 serially-passaged in medium containing 2 µg/mL puromycin HCl until resistant cells grew  
526 out.

527

528 **Metabolic labeling.** i159<sup>HA</sup> or i148<sup>HA</sup> cells were seeded at  $2 \times 10^5$  cells per well in a 24-  
529 well cluster plate in Gibco OptiMEM reduced serum medium (Thermo Fisher)  
530 supplemented with 2.5% tetracycline (tet)-free FBS (Clontech #631101). The following  
531 day, medium was replaced with 2.5% tet-free FBS OptiMEM supplemented with either  
532 100 ng/mL doxycycline hyclate (dox, Sigma Aldrich #D9891, added from a 1000× stock)  
533 or the addition of 0.1% (vol/vol) of sterile water to control for volume of dox stock solution  
534 (mock induction). At 24 h post-induction, cells were washed twice in PBS supplemented  
535 with 1 mM CaCl<sub>2</sub> and 0.5 mM MgCl<sub>2</sub> and then incubated for 1 h in starving medium  
536 (DMEM lacking methionine, cysteine, and glutamine, (Gibco #21013024, supplemented  
537 with 5% dialyzed FBS, Sigma #F0392, and 2 mM glutamine). Cells were then pulse-  
538 labeled in starving medium containing 150 µCi/mL <sup>35</sup>S-Met/Cys (PerkinElmer #NEG772)  
539 for 30 min. Dox or mock treatment was maintained throughout the starving and pulsing  
540 steps. As a positive control for translation shutdown, i159<sup>HA</sup> ARPE19 cells were treated  
541 with 2 µM thapsigargin (Sigma #T9033) or 0.1% dimethyl-sulfoxide (DMSO) as a carrier-  
542 control at 1 h prior to Met/Cys starvation, and treatment was maintained throughout the  
543 starvation and pulse-labeling steps. Following pulse-labeling, cells were washed three  
544 times in PBS containing 1 mM CaCl<sub>2</sub> and 0.5 mM MgCl<sub>2</sub>, and then immediately lysed in



545 2 × Laemmli buffer [120 mM Tris pH 6.8, 4% SDS, 20% glycerol, 0.02% bromophenol  
546 blue]. Beta-mercaptoethanol was then added to a final concentration of 5% vol/vol, and  
547 the samples were heated at 95°C for 10 min. Equal volumes of lysate were resolved by  
548 sodium dodecyl sulfate polyacrylamide gel electrophoresis (SDS-PAGE) on 12%  
549 acrylamide NuPAGE Bis-Tris precast gels (Invitrogen #NP0321) according to  
550 manufacturer's instructions. Gels were dried and exposed to a phosphor screen for 24 h  
551 before results were captured using an Amersham Typhoon IP scanner (GE Healthcare).  
552 Relative signal per lane was calculated using Bio-Rad 1-D analysis software by reading  
553 the signal volume (counts\*mm<sup>2</sup>) in each lane. Lane signals were normalized either to (i)  
554 the DMSO treatment condition or (ii) each respective non-treatment condition.

555

#### 556 **Cell viability assay**

557 1 × 10<sup>5</sup> i148<sup>HA</sup> or i159<sup>HA</sup> ARPE-19 cells per well were seeded in a 24 well cluster plate  
558 and incubated overnight. Medium was exchanged for complete DMEM containing 100  
559 ng/mL doxycycline and incubated for 24 h. Cells were then trypsinized, transferred to 1.5  
560 mL microfuge tubes and spun down at 400 × g for 5 min. Cell pellets were resuspended  
561 in 100 µL fresh medium and combined with 100 µL of PBS containing 0.4% Trypan Blue  
562 (Bio-Rad), mixed thoroughly and counted for viability (trypan blue exclusion) and total cell  
563 number using a hemacytometer (Bright-Line).

564

#### 565 **Doxycycline induction of UL148 and Rh159 from stably transduced ARPE-19 cells.**

566 For each well of a 24 well cluster plate, 2 × 10<sup>5</sup> cells of iUL148 or iRh159 ARPE19 cells  
567 were seeded in 500 µl OptiMEM medium containing 2.5% tetracycline(tet)-free FBS

568 (Clontech #631101). Following a 24 h incubation at 37<sup>0</sup>C, medium was replaced with  
569 fresh 2.5% tet-free FBS/OptiMEM supplemented with 100 ng/mL doxycycline hyclate  
570 (dox, Sigma Aldrich #9891). Where indicated, parallel wells of ARPE-19 cells were  
571 incubated for 4 h in the presence of 200 nM thapsigargin (Tg) prior to harvest. At the  
572 indicated times post treatment, cells were washed in PBS and lysed for 1 h at 4°C using  
573 50 µl per well of lysis buffer (1% Triton X-100, 400 mM NaCl, 0.5% sodium deoxycholate,  
574 50 mM HEPES pH 7.5) supplemented with 1 × protease inhibitor cocktail (Cell Signaling  
575 Technology). Lysates were collected and spun down at 18,000 × g for 30 min at 4°C.  
576 Protein concentrations of supernatants were measured using the BCA assay (Thermo  
577 Pierce), normalized, and subjected to western blot.

578

#### 579 **siRNA treatments.**

580 2 × 10<sup>5</sup> HFFTs per well of a 24-well plate were reverse transfected with 5 pmol per well  
581 of a Dharmacon siGENOME SMARTpool specific for human PERK (EIF2AK3, M004883-  
582 03-005) or with a non-targeting control SMARTpool (D-001206-14-05), using 4.5 µL of  
583 Lipofectamine RNAiMAX per well, as described previously (16). Briefly, siRNA  
584 transfection complexes in OptiMEM medium were added to wells prior to applying freshly  
585 trypsinized HFFT suspended in 0.45 mL of DMEM containing 8% FBS, 25 µg/mL  
586 gentamicin, and 10 µg/mL ciprofloxacin-HCl. 24 h post-seeding, cells were infected with  
587 the indicated viruses at an MOI of 1 TCID<sub>50</sub> per cell. Sequences of the siRNAs in each  
588 SMARTpool are provided in Table 2.

589

#### 590 **Xbp-1 splicing assay.**

591 HEK-293T cells were seeded into 24-well plates for overnight culture and transfected  
592 once they reached 80-90% confluency using the TransIT 2020 reagent (Mirus, Inc.), with  
593 each well receiving 1 µg plasmid DNA carried by 3 µL of the transfection reagent. 48 h  
594 post transfection, cells were harvested and total RNA was extracted using the Qiagen  
595 RNeasy mini kit as per the manufacturer's protocol, including the optional column  
596 DNAase digestion step. cDNA was generated from 1 µg RNA using the qScript™ cDNA  
597 Synthesis Kit (Quantabio, Cat# 95047-100) in a 20 µL final reaction volume. One  
598 microliter of the resulting cDNA solution was then used as template for a PCR reaction  
599 using primers Xbp-1\_FWD and Xbp-1\_REV (Table 1). In the context of infection (Fig. 4),  
600 detection of *IE2 (UL122)* mRNA was included as indicator of HCMV infection. The *IE2*  
601 primer pair was designed using PrimerQuest software (Integrated DNA Technologies,  
602 Coralville, IA), and includes one oligonucleotide whose priming site spans the junction of  
603 exons 3 and 5 (Table 1).

604

#### 605 **Quantitative reverse-transcriptase PCR.**

606 mRNA levels were quantified using reverse-transcriptase qPCR (RT-qPCR). For these  
607 experiments,  $2 \times 10^6$  HFFT cells per well were seeded in a 6 well cluster plate, incubated  
608 overnight and subsequently infected at MOI 1. At 24 hpi, inocula were removed and  
609 replaced with fresh medium. At 72 hpi, total RNA was extracted using a Qiagen RNeasy  
610 Mini Kit (Qiagen, Inc.), including the optional on-column DNase digestion step, as per the  
611 manufacturer's instructions. cDNA was generated from 1 µg RNA using the qScript™  
612 cDNA synthesis kit. For each qPCR reaction, 1 µl of cDNA was used as template in a  
613 15 µL final reaction volume using iQ SYBR Green Supermix (Bio-Rad, Inc.) on a CFX96

614 Real Time PCR system (Bio-Rad). mRNA levels for each gene were measured in  
615 triplicate technical replicates per biological replicate, with a total of three independent  
616 biological replicates, and the  $2^{-\Delta\Delta C_T}$  method (58) was used to determine quantitative  
617 estimates of relative gene expression, with all readings being normalized to *GAPDH*  
618 transcript levels. Canonical UPR responsive target genes were detected using previously  
619 validated qPCR primer pairs (29, 59), while levels of the viral *IE1* (*UL123*) mRNA were  
620 also measured as an indicator of HCMV infection (Table 1). PCR efficiencies for primer  
621 pairs ranged from 91.1% - 99.0% for the indicated UPR target genes and were 93.4% for  
622 *GAPDH* and 90.7% for *IE1*. Statistical Analyses were done using GraphPad Prism  
623 software, version 6.0h (GraphPad, Inc., La Jolla, CA).

624

#### 625 **Antibodies used in this study**

626 The following rabbit monoclonal antibodies (mAbs) from Cell Signaling Technology,  
627 (Danvers, MA) were used: ATF4 clone D4B8 (cat. #11815S), PERK clone C33E10 (cat.  
628 #3192S), Phospho-eIF2 $\alpha$  Ser51 clone D9G8 (cat. #3398S), total eIF2 $\alpha$  clone D7D3 (cat.  
629 #5324S). IE1 was detected using mouse mAb clone 1B12 (Gift of Thomas Shenk,  
630 Princeton University), beta-actin using a rabbit mAb, (Li-Cor Biosciences, Inc.; cat. #926-  
631 42210), a rabbit polyclonal anti-HA epitope antibody (Bethyl Laboratories, Inc.,  
632 Montgomery, TX), and a previously described rabbit polyclonal serum specific for UL148  
633 (19).

#### 634 **Western blotting**

635 For detection of all proteins other than phospho-Ser51 eIF2 $\alpha$  (see below), western blotting  
636 was carried out as previously described (16, 19, 52). Briefly, cells were lysed at 4°C for  
637 1 h in lysis buffer [1% Triton X-100, 400 mM NaCl, 0.5% sodium deoxycholate, 50 mM 4-  
638 (2-hydroxyethyl)-1-piperazineethanesulfonic acid (HEPES) pH 7.5 supplemented with 1  
639 × protease inhibitor cocktail (Cell Signaling Technology)]. Lysates were clarified by  
640 centrifugation at 18,000 × *g* for 30 min at 4°C, combined with an equal volume of 2 ×  
641 Laemmli buffer containing 10% betamercaptoethanol, heated at 85°C for 10 min prior to  
642 being resolved by SDS-PAGE on 10% acrylamide gels and transferred to nitrocellulose  
643 membranes (Whatman Protran®, 0.45  $\mu$ m pore size). Efficient transfer was confirmed  
644 using Ponceau S staining (not shown). All subsequent blocking, washes, and incubation  
645 steps were performed with gentle rocking. Membranes were blocked using a solution of  
646 5% powdered milk (PM) in PBS containing 0.01% Tween-20 (PBST), (PM-PBST). Unless  
647 otherwise noted, all antibodies were applied to membranes in PM-PBST, as a 1:1000  
648 dilution, or for IE1 mAb, a 1:200 dilution of the hybridoma supernatant, and incubated  
649 overnight 4°C, or for 1 h at room temperature. Following three 5 min washes in 1 × PBS,  
650 IRDye-800 conjugated donkey anti-rabbit or anti-mouse secondary antibodies (Li-Cor,  
651 Inc.) were applied at 1:10,000 in PM-PBST and incubated for 1 h. After 3 washes in  
652 PBST, immunoreactive polypeptides were detected, and where applicable, quantified  
653 using a Li-Cor Odyssey Imager (Li-Cor Biosciences). For detection of Ser51  
654 phosphorylated eIF2 $\alpha$ , a protocol from the laboratory of David Ron (Cambridge Institute  
655 for Medical Research, United Kingdom) was used. The differences from our standard  
656 procedures were as follows: Membranes were blocked for 2 h at room temperature in a  
657 solution of 5% bovine serum albumin (BSA) in PBS containing 0.01% Tween-20, followed

658 by a second 10 min blocking step in PM-PBST. Following three washes in PBS,  
659 membranes were incubated overnight in a solution of phospho-eIF2 $\alpha$  antibody diluted  
660 1:1000 in PBS supplemented with 5% BSA.

661

662 **ACKNOWLEDGMENTS**

663 This project was supported by NIH Grants R01-AI116851 and P30GM110703. Its  
664 contents are solely the responsibility of the authors and do not necessarily represent the  
665 official views of the NIAID or the NIGMS. C.C.N. was supported by a Malcolm Feist  
666 Predoctoral Fellowship from the Center of Cardiovascular Diseases and Sciences at  
667 LSU Health Sciences Center, Shreveport. We are grateful to Thomas Shenk (Princeton  
668 University, Princeton, NJ, USA), Christian Sinzger (University of Ulm Medical Center,  
669 Ulm, Germany), and Klaus Früh (Oregon Health Sciences University, Beaverton, OR,  
670 USA) for generously providing reagents.

671

672

673 **FIGURES.**

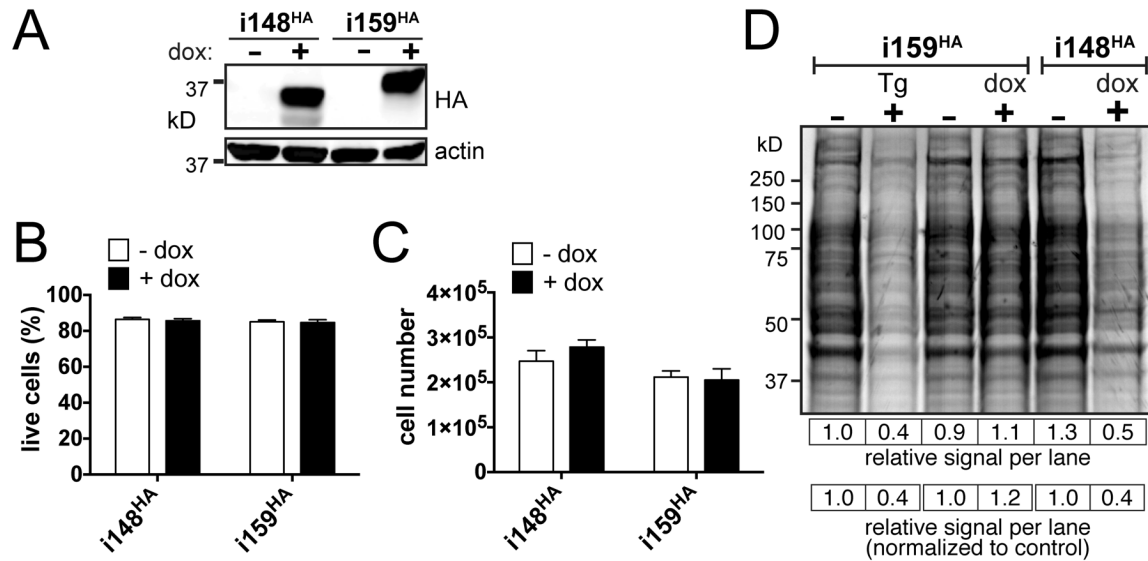

674

675 **FIGURE 1. Ectopic expression of UL148 attenuates translation**

676 **(A)** Validation of expression system: i148<sup>HA</sup> and i159<sup>HA</sup> ARPE-19 cells were treated with  
 677 either 100 ng/mL doxycycline (dox) or carrier-alone (water) and subjected to western  
 678 blot using anti-HA antibodies; beta-actin (actin) was detected as a loading control. **(B)**  
 679 and **(C)** UL148 expression does not have overtly toxic effects: i148<sup>HA</sup> and i159<sup>HA</sup>  
 680 ARPE-19 cells were dox- or mock induced for 24 h. Viable cells from triplicate  
 681 treatments were scored using trypan blue exclusion and total cell number on a  
 682 hemacytometer. **(D)** i148<sup>HA</sup> and i159<sup>HA</sup> cells were either dox induced or mock treated  
 683 (0.1% water) for 24 h, and in parallel, additional wells of i159<sup>HA</sup> cells were treated for 2 h  
 684 with either 2 μM thapsigargin (Tg) or 0.1% DMSO carrier-alone. Cells were then pulsed  
 685 with <sup>35</sup>S methionine +cysteine for 30 min, and protein lysates were resolved by SDS-  
 686 PAGE and imaged by autoradiography. Quantitation of the total signal intensity per  
 687 lane is shown relative to that of the (-) Tg lane (leftmost) directly below the gel image  
 688 and for each treatment lane relative to its paired negative control.  
 689



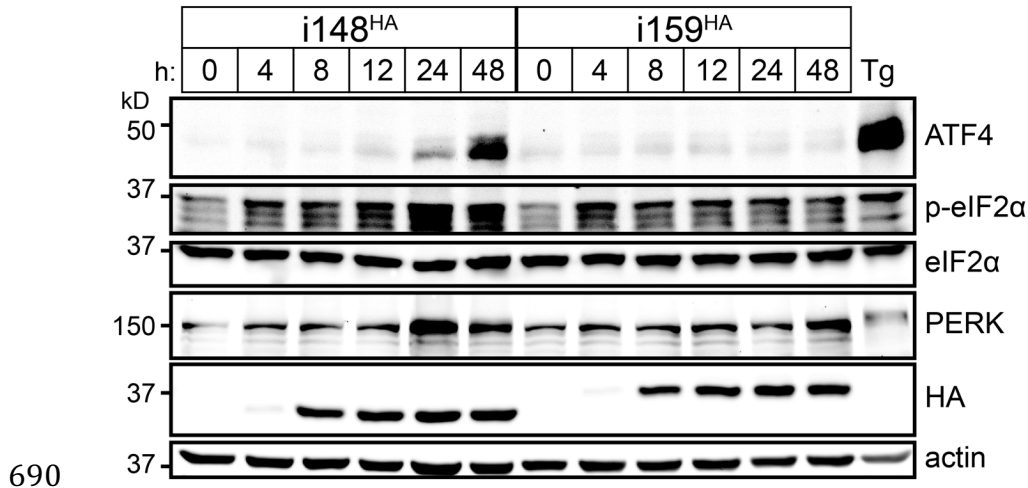

690

691 **FIGURE. 2. UL148 expression causes phosphorylation of eIF2 $\alpha$  and accumulation**  
692 **of ATF4, suggesting activation of PERK**

693 i148<sup>HA</sup> and i159<sup>HA</sup> ARPE-19 cells were induced for expression of UL148 and Rh159,  
694 respectively, using 100 ng/mL doxycycline (dox) for the indicated times. A 4 h treatment  
695 with thapsigargin (Tg) (0.4  $\mu$ M) was included as positive control. For each sample, a  
696 volume of lysate equivalent to 17.5  $\mu$ g of detergent soluble protein was analyzed by  
697 western blot for levels of the indicated proteins.

698

699

700  
701

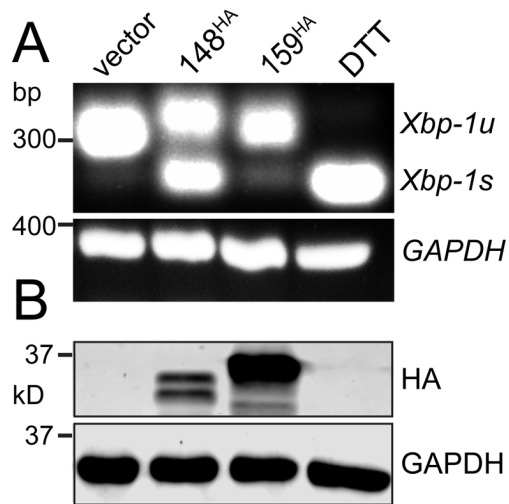

702

703 **FIGURE 3. UL148 induces splicing of *Xbp-1* mRNA**

704 HEK-293T cells were transfected with 1  $\mu$ g of plasmid DNA for the indicated expression  
705 constructs or with empty vector as a negative control. (A) 48 h post transfection, total  
706 RNA was isolated and used in an RT-PCR assay to detect removal of the 26 nt intron  
707 from *Xbp-1* mRNA. *Xbp-1s*: spliced message, *Xbp-1u*: unspliced message. A 2 h  
708 treatment with dithiothreitol (DTT, 1 mM) was used as positive control. (B) UL148 and  
709 Rh159 were detected using anti-HA western blot. In both panels, *gapdh* mRNA or  
710 GAPDH protein was detected as a loading control.

711

712

713

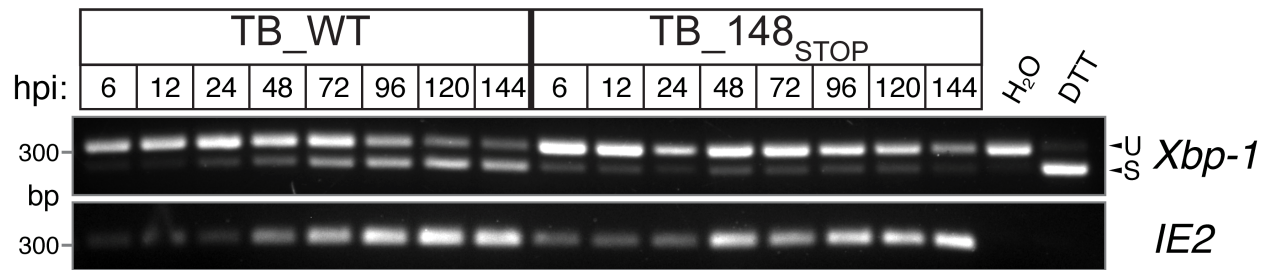

714

**FIGURE 4. UL148 activates IRE1 during HCMV infection.**

715

Fibroblasts were infected MOI of 1 TCID<sub>50</sub> per cell with wild-type HCMV strain TB40/E,

716

(TB\_WT) or a *UL148*-null mutant virus, (TB\_148<sub>STOP</sub>). At the indicated times post

717

infection, total RNA was harvested and subjected to RT-PCR to detect IRE1 catalyzed

718

removal of the 26 bp intron from the *Xbp-1* mRNA. Semi-quantitative RT-PCR of *IE2*

719

(*UL122*) is shown as a control to indicate HCMV gene expression. U: unspliced, S:

720

spliced. DTT: dithiothreitol, a positive control.

721

722

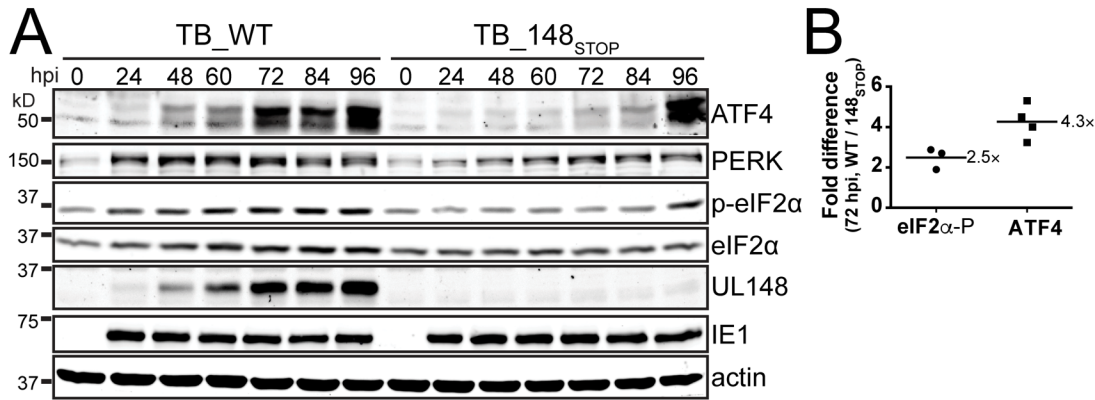

723

724 **FIGURE 5. UL148 is required for increases in eIF2 $\alpha$  phosphorylation and ATF4**  
725 **protein expression during HCMV infection.**

726 **(A)** Fibroblasts were infected MOI of 1 TCID<sub>50</sub> per cell with TB\_WT or TB\_148<sub>STOP</sub>  
727 viruses for the indicated times and subsequently assayed by western blot (25  $\mu$ g of  
728 protein per lane) for levels of ATF4, PERK, p-eIF2 $\alpha$ , eIF2 $\alpha$ , UL148, IE1, and beta-actin.

729 **(B)** Fold-difference in phospho-eIF2 $\alpha$  (p-eIF2 $\alpha$ ) and ATF4 protein signals at 72 hpi  
730 between TB\_WT or TB\_148<sub>STOP</sub>. Fluorescence signal from secondary antibodies at the  
731 72 hpi time points was quantified from western blots comparing TB\_WT and  
732 TB\_148<sub>STOP</sub> infections, as in **(A)**, using three independent biological replicates for p-  
733 eIF2 $\alpha$  and four biological replicates for ATF4.

734

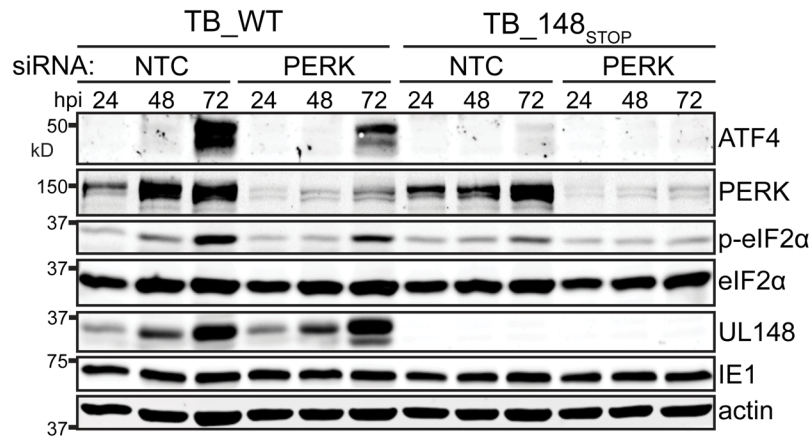

735

736 **FIGURE 6. PERK contributes to the effects of UL148 on eIF2α phosphorylation**  
737 **and ATF4 protein levels.**

738 Fibroblasts were reverse-transfected using an siRNA SMARTpool targeting PERK or a  
739 non-targeting control siRNA pool (NTC). 24 h later, the cells were infected at an MOI of 1  
740 TCID<sub>50</sub> per cell with either TB\_WT or TB\_148<sub>STOP</sub> viruses for the indicated times. Cell  
741 lysates were assayed by immunoblot for expression of the indicated proteins.  
742

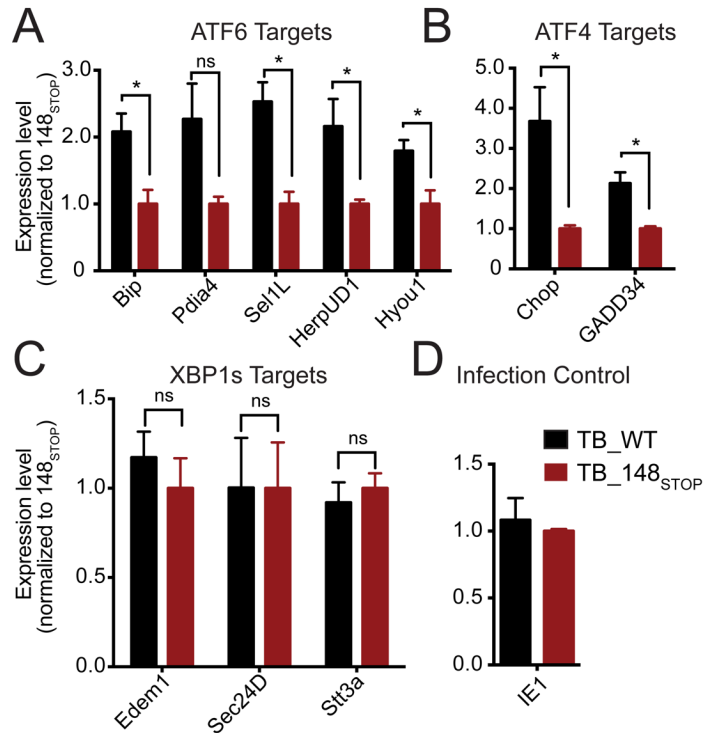

743

744 **FIGURE 7. Analysis of mRNA levels for UPR target genes during WT and UL148-**  
745 **null infection.** Fibroblasts were infected at an MOI of 1 TCID<sub>50</sub> per cell with TB\_WT or  
746 TB\_148<sub>STOP</sub> viruses. At 72 h post infection, mRNA levels for the indicated genes were  
747 analyzed by quantitative RT-PCR. Asterisks indicate differences found to be  
748 statistically significant in a two-tailed T-test (P<0.05).

749

750

## 751 REFERENCES

752

- 753 1. Lin JH, Walter P, Yen TS. 2008. Endoplasmic reticulum stress in disease  
754 pathogenesis. *Annu Rev Pathol* 3:399-425.
- 755 2. Voeltz GK, Rolls MM, Rapoport TA. 2002. Structural organization of the endoplasmic  
756 reticulum. *EMBO Rep* 3:944-50.
- 757 3. Kleijmeer MJ, Kelly A, Geuze HJ, Slot JW, Townsend A, Trowsdale J. 1992. Location of  
758 MHC-encoded transporters in the endoplasmic reticulum and cis-Golgi. *Nature*  
759 357:342-4.
- 760 4. Kartenbeck J, Stukenbrok H, Helenius A. 1989. Endocytosis of simian virus 40 into  
761 the endoplasmic reticulum. *J Cell Biol* 109:2721-9.
- 762 5. Tsai B, Gilbert JM, Stehle T, Lencer W, Benjamin TL, Rapoport TA. 2003. Gangliosides  
763 are receptors for murine polyoma virus and SV40. *EMBO J* 22:4346-55.
- 764 6. Gillespie LK, Hoenen A, Morgan G, Mackenzie JM. 2010. The endoplasmic reticulum  
765 provides the membrane platform for biogenesis of the flavivirus replication  
766 complex. *J Virol* 84:10438-47.
- 767 7. Bailey D, Kaiser WJ, Hollinshead M, Moffat K, Chaudhry Y, Wileman T, Sosnovtsev SV,  
768 Goodfellow IG. 2010. Feline calicivirus p32, p39 and p30 proteins localize to the  
769 endoplasmic reticulum to initiate replication complex formation. *J Gen Virol* 91:739-  
770 49.
- 771 8. Ron D, Walter P. 2007. Signal integration in the endoplasmic reticulum unfolded  
772 protein response. *Nat Rev Mol Cell Biol* 8:519-29.
- 773 9. Walter P, Ron D. 2011. The unfolded protein response: from stress pathway to  
774 homeostatic regulation. *Science* 334:1081-6.
- 775 10. Isler JA, Skalet AH, Alwine JC. 2005. Human cytomegalovirus infection activates and  
776 regulates the unfolded protein response. *J Virol* 79:6890-9.
- 777 11. Qian Z, Xuan B, Chapa TJ, Gualberto N, Yu D. 2012. Murine cytomegalovirus targets  
778 transcription factor ATF4 to exploit the unfolded-protein response. *J Virol* 86:6712-  
779 23.
- 780 12. Stahl S, Burkhart JM, Hinte F, Tirosh B, Mohr H, Zahedi RP, Sickmann A, Ruzsics Z,  
781 Budt M, Brune W. 2013. Cytomegalovirus downregulates IRE1 to repress the  
782 unfolded protein response. *PLoS Pathog* 9:e1003544.
- 783 13. Lee AH, Iwakoshi NN, Glimcher LH. 2003. XBP-1 regulates a subset of endoplasmic  
784 reticulum resident chaperone genes in the unfolded protein response. *Mol Cell Biol*  
785 23:7448-59.
- 786 14. Hollien J, Lin JH, Li H, Stevens N, Walter P, Weissman JS. 2009. Regulated Ire1-  
787 dependent decay of messenger RNAs in mammalian cells. *J Cell Biol* 186:323-31.
- 788 15. Yu Y, Pierciey FJ, Jr., Maguire TG, Alwine JC. 2013. PKR-like endoplasmic reticulum  
789 kinase is necessary for lipogenic activation during HCMV infection. *PLoS Pathog*  
790 9:e1003266.
- 791 16. Nguyen C, Siddiquey MNA, Zhang H, Kamil JP. 2018. Human cytomegalovirus  
792 tropism modulator UL148 interacts with SEL1L, a cellular factor that governs ER-  
793 associated degradation of the viral envelope glycoprotein, gO.  
794 bioRxiv:<https://doi.org/10.1101/304394>.

- 795 17. Lilja AE, Chang WL, Barry PA, Becerra SP, Shenk TE. 2008. Functional genetic  
796 analysis of rhesus cytomegalovirus: Rh01 is an epithelial cell tropism factor. *J Virol*  
797 82:2170-81.
- 798 18. Sturgill ER, Malouli D, Hansen SG, Burwitz BJ, Seo S, Schneider CL, Womack JL,  
799 Verweij MC, Ventura AB, Bhusari A, Jeffries KM, Legasse AW, Axthelm MK, Hudson  
800 AW, Sacha JB, Picker LJ, Fruh K. 2016. Natural Killer Cell Evasion Is Essential for  
801 Infection by Rhesus Cytomegalovirus. *PLoS Pathog* 12:e1005868.
- 802 19. Li G, Nguyen CC, Ryckman BJ, Britt WJ, Kamil JP. 2015. A viral regulator of  
803 glycoprotein complexes contributes to human cytomegalovirus cell tropism. *Proc*  
804 *Natl Acad Sci U S A* 112:4471-6.
- 805 20. Wang ECY, Pjechova M, Nightingale K, Vlahava VM, Patel M, Ruckova E, Forbes SK,  
806 Nobre L, Antrobus R, Roberts D, Fielding CA, Seirafian S, Davies J, Murrell I, Lau B,  
807 Wilkie GS, Suarez NM, Stanton RJ, Vojtesek B, Davison A, Lehner PJ, Weekes MP,  
808 Wilkinson GWG, Tomasec P. 2018. Suppression of costimulation by human  
809 cytomegalovirus promotes evasion of cellular immune defenses. *Proc Natl Acad Sci*  
810 *U S A* 115:4998-5003.
- 811 21. Harding HP, Zhang Y, Ron D. 1999. Protein translation and folding are coupled by an  
812 endoplasmic-reticulum-resident kinase. *Nature* 397:271-4.
- 813 22. Pavitt GD, Ramaiah KV, Kimball SR, Hinnebusch AG. 1998. eIF2 independently binds  
814 two distinct eIF2B subcomplexes that catalyze and regulate guanine-nucleotide  
815 exchange. *Genes Dev* 12:514-26.
- 816 23. Proud CG. 2005. eIF2 and the control of cell physiology. *Semin Cell Dev Biol* 16:3-12.
- 817 24. Harding HP, Novoa I, Zhang Y, Zeng H, Wek R, Schapira M, Ron D. 2000. Regulated  
818 translation initiation controls stress-induced gene expression in mammalian cells.  
819 *Mol Cell* 6:1099-108.
- 820 25. Calfon M, Zeng H, Urano F, Till JH, Hubbard SR, Harding HP, Clark SG, Ron D. 2002.  
821 IRE1 couples endoplasmic reticulum load to secretory capacity by processing the  
822 XBP-1 mRNA. *Nature* 415:92-6.
- 823 26. Lee K, Tirasophon W, Shen X, Michalak M, Prywes R, Okada T, Yoshida H, Mori K,  
824 Kaufman RJ. 2002. IRE1-mediated unconventional mRNA splicing and S2P-mediated  
825 ATF6 cleavage merge to regulate XBP1 in signaling the unfolded protein response.  
826 *Genes Dev* 16:452-66.
- 827 27. Yoshida H, Matsui T, Yamamoto A, Okada T, Mori K. 2001. XBP1 mRNA is induced by  
828 ATF6 and spliced by IRE1 in response to ER stress to produce a highly active  
829 transcription factor. *Cell* 107:881-91.
- 830 28. Sidrauski C, Walter P. 1997. The transmembrane kinase Ire1p is a site-specific  
831 endonuclease that initiates mRNA splicing in the unfolded protein response. *Cell*  
832 90:1031-9.
- 833 29. Shoulders MD, Ryno LM, Genereux JC, Moresco JJ, Tu PG, Wu C, Yates JR, 3rd, Su AI,  
834 Kelly JW, Wiseman RL. 2013. Stress-independent activation of XBP1s and/or ATF6  
835 reveals three functionally diverse ER proteostasis environments. *Cell Rep* 3:1279-  
836 92.
- 837 30. Buchkovich NJ, Yu Y, Pierciey FJ, Jr., Alwine JC. 2010. Human cytomegalovirus  
838 induces the endoplasmic reticulum chaperone BiP through increased transcription  
839 and activation of translation by using the BiP internal ribosome entry site. *J Virol*  
840 84:11479-86.



- 841 31. Davison AJ, Dolan A, Akter P, Addison C, Dargan DJ, Alcendor DJ, McGeoch DJ,  
842 Hayward GS. 2003. The human cytomegalovirus genome revisited: comparison with  
843 the chimpanzee cytomegalovirus genome. *J Gen Virol* 84:17-28.
- 844 32. Murphy E, Rigoutsos I, Shibuya T, Shenk TE. 2003. Reevaluation of human  
845 cytomegalovirus coding potential. *Proc Natl Acad Sci U S A* 100:13585-90.
- 846 33. Stern-Ginossar N, Weisburd B, Michalski A, Le VT, Hein MY, Huang SX, Ma M, Shen B,  
847 Qian SB, Hengel H, Mann M, Ingolia NT, Weissman JS. 2012. Decoding human  
848 cytomegalovirus. *Science* 338:1088-93.
- 849 34. Cha TA, Tom E, Kemble GW, Duke GM, Mocarski ES, Spaete RR. 1996. Human  
850 cytomegalovirus clinical isolates carry at least 19 genes not found in laboratory  
851 strains. *J Virol* 70:78-83.
- 852 35. Dunn W, Chou C, Li H, Hai R, Patterson D, Stolc V, Zhu H, Liu F. 2003. Functional  
853 profiling of a human cytomegalovirus genome. *Proc Natl Acad Sci U S A* 100:14223-  
854 8.
- 855 36. Yoshida H, Matsui T, Hosokawa N, Kaufman RJ, Nagata K, Mori K. 2003. A time-  
856 dependent phase shift in the mammalian unfolded protein response. *Dev Cell* 4:265-  
857 71.
- 858 37. Yoshida H, Oku M, Suzuki M, Mori K. 2006. pXBP1(U) encoded in XBP1 pre-mRNA  
859 negatively regulates unfolded protein response activator pXBP1(S) in mammalian  
860 ER stress response. *J Cell Biol* 172:565-75.
- 861 38. Urano F, Wang X, Bertolotti A, Zhang Y, Chung P, Harding HP, Ron D. 2000. Coupling  
862 of stress in the ER to activation of JNK protein kinases by transmembrane protein  
863 kinase IRE1. *Science* 287:664-6.
- 864 39. Fink SL, Jayewickreme TR, Molony RD, Iwawaki T, Landis CS, Lindenbach BD,  
865 Iwasaki A. 2017. IRE1alpha promotes viral infection by conferring resistance to  
866 apoptosis. *Sci Signal* 10.
- 867 40. Ye J, Rawson RB, Komuro R, Chen X, Dave UP, Prywes R, Brown MS, Goldstein JL.  
868 2000. ER stress induces cleavage of membrane-bound ATF6 by the same proteases  
869 that process SREBPs. *Mol Cell* 6:1355-64.
- 870 41. Yoshida H, Haze K, Yanagi H, Yura T, Mori K. 1998. Identification of the cis-acting  
871 endoplasmic reticulum stress response element responsible for transcriptional  
872 induction of mammalian glucose-regulated proteins. Involvement of basic leucine  
873 zipper transcription factors. *J Biol Chem* 273:33741-9.
- 874 42. Vincent HA, Ziehr B, Moorman NJ. 2016. Human Cytomegalovirus Strategies to  
875 Maintain and Promote mRNA Translation. *Viruses* 8:97.
- 876 43. Xuan B, Qian Z, Torigoi E, Yu D. 2009. Human cytomegalovirus protein pUL38  
877 induces ATF4 expression, inhibits persistent JNK phosphorylation, and suppresses  
878 endoplasmic reticulum stress-induced cell death. *J Virol* 83:3463-74.
- 879 44. Sriburi R, Jackowski S, Mori K, Brewer JW. 2004. XBP1: a link between the unfolded  
880 protein response, lipid biosynthesis, and biogenesis of the endoplasmic reticulum. *J*  
881 *Cell Biol* 167:35-41.
- 882 45. Roy B, Lee AS. 1999. The mammalian endoplasmic reticulum stress response  
883 element consists of an evolutionarily conserved tripartite structure and interacts  
884 with a novel stress-inducible complex. *Nucleic Acids Res* 27:1437-43.

- 885 46. Maiuolo J, Bulotta S, Verderio C, Benfante R, Borgese N. 2011. Selective activation of  
886 the transcription factor ATF6 mediates endoplasmic reticulum proliferation  
887 triggered by a membrane protein. *Proc Natl Acad Sci U S A* 108:7832-7.
- 888 47. Cox JS, Chapman RE, Walter P. 1997. The unfolded protein response coordinates the  
889 production of endoplasmic reticulum protein and endoplasmic reticulum  
890 membrane. *Mol Biol Cell* 8:1805-14.
- 891 48. Reimold AM, Iwakoshi NN, Manis J, Vallabhajosyula P, Szomolanyi-Tsuda E,  
892 Gravallesse EM, Friend D, Grusby MJ, Alt F, Glimcher LH. 2001. Plasma cell  
893 differentiation requires the transcription factor XBP-1. *Nature* 412:300-7.
- 894 49. Qian Z, Xuan B, Gualberto N, Yu D. 2011. The human cytomegalovirus protein pUL38  
895 suppresses endoplasmic reticulum stress-mediated cell death independently of its  
896 ability to induce mTORC1 activation. *J Virol* 85:9103-13.
- 897 50. Tirosch B, Iwakoshi NN, Lilley BN, Lee AH, Glimcher LH, Ploegh HL. 2005. Human  
898 cytomegalovirus protein US11 provokes an unfolded protein response that may  
899 facilitate the degradation of class I major histocompatibility complex products. *J*  
900 *Virol* 79:2768-79.
- 901 51. Bergmann TJ, Fregno I, Fumagalli F, Rinaldi A, Bertoni F, Boersema PJ, Picotti P,  
902 Molinari M. 2018. Chemical stresses fail to mimic the unfolded protein response  
903 resulting from luminal load with unfolded polypeptides. *J Biol Chem* 293:5600-  
904 5612.
- 905 52. Wang D, Li G, Schauflinger M, Nguyen CC, Hall ED, Yurochko AD, von Einem J, Kamil  
906 JP. 2013. The ULb' region of the human cytomegalovirus genome confers an  
907 increased requirement for the viral protein kinase UL97. *J Virol* 87:6359-76.
- 908 53. Sinzger C, Hahn G, Digel M, Katona R, Sampaio KL, Messerle M, Hengel H,  
909 Koszinowski U, Brune W, Adler B. 2008. Cloning and sequencing of a highly  
910 productive, endotheliotropic virus strain derived from human cytomegalovirus  
911 TB40/E. *J Gen Virol* 89:359-68.
- 912 54. Meerbrey KL, Hu G, Kessler JD, Roarty K, Li MZ, Fang JE, Herschkowitz JI, Burrows  
913 AE, Ciccia A, Sun T, Schmitt EM, Bernardi RJ, Fu X, Bland CS, Cooper TA, Schiff R,  
914 Rosen JM, Westbrook TF, Elledge SJ. 2011. The pINDUCER lentiviral toolkit for  
915 inducible RNA interference in vitro and in vivo. *Proc Natl Acad Sci U S A* 108:3665-  
916 70.
- 917 55. Gibson DG, Smith HO, Hutchison CA, 3rd, Venter JC, Merryman C. 2010. Chemical  
918 synthesis of the mouse mitochondrial genome. *Nat Methods* 7:901-3.
- 919 56. Macias MP, Huang L, Lashmit PE, Stinski MF. 1996. Cellular or viral protein binding  
920 to a cytomegalovirus promoter transcription initiation site: effects on transcription.  
921 *J Virol* 70:3628-35.
- 922 57. Ho SN, Hunt HD, Horton RM, Pullen JK, Pease LR. 1989. Site-directed mutagenesis by  
923 overlap extension using the polymerase chain reaction. *Gene* 77:51-9.
- 924 58. Livak KJ, Schmittgen TD. 2001. Analysis of relative gene expression data using real-  
925 time quantitative PCR and the 2<sup>(-Delta Delta C(T))</sup> Method. *Methods* 25:402-8.
- 926 59. van Galen P, Kreso A, Mbong N, Kent DG, Fitzmaurice T, Chambers JE, Xie S, Laurenti  
927 E, Hermans K, Eppert K, Marciniak SJ, Goodall JC, Green AR, Wouters BG, Wienholds  
928 E, Dick JE. 2014. The unfolded protein response governs integrity of the  
929 haematopoietic stem-cell pool during stress. *Nature* 510:268-72.
- 930
